# Supplementary material
Source: PubMed Central journal article supplement (PMC3640632)
Supplement: NIHMS449303-supplement-02.pdf [file NIHMS449303-supplement-02.pdf]

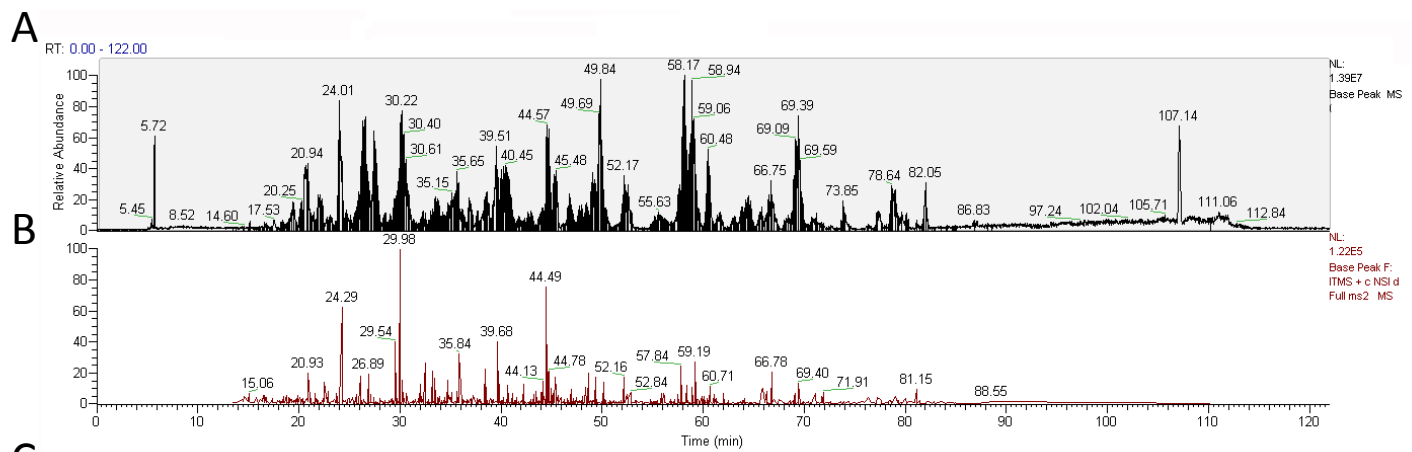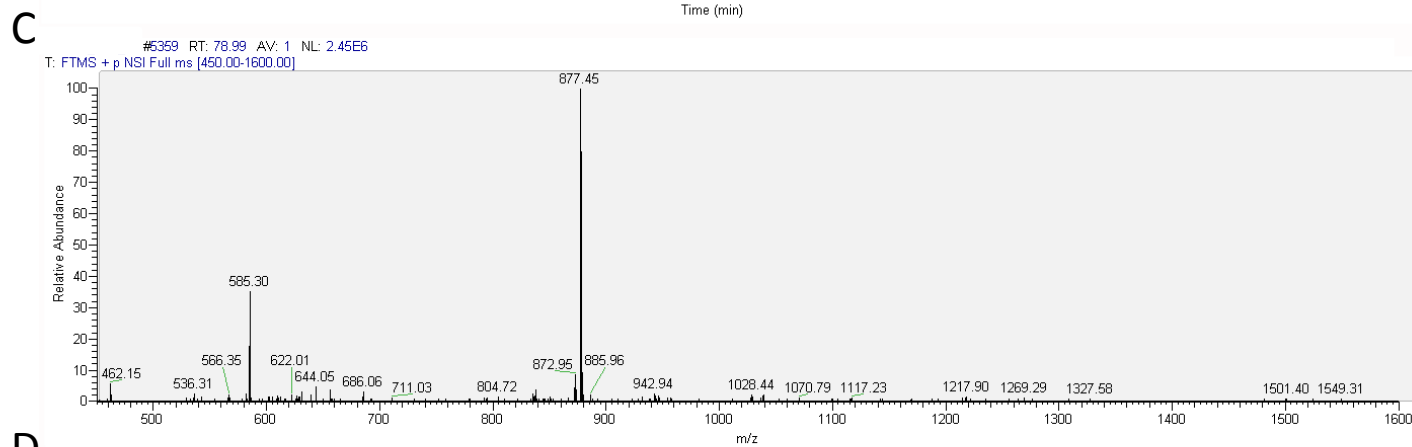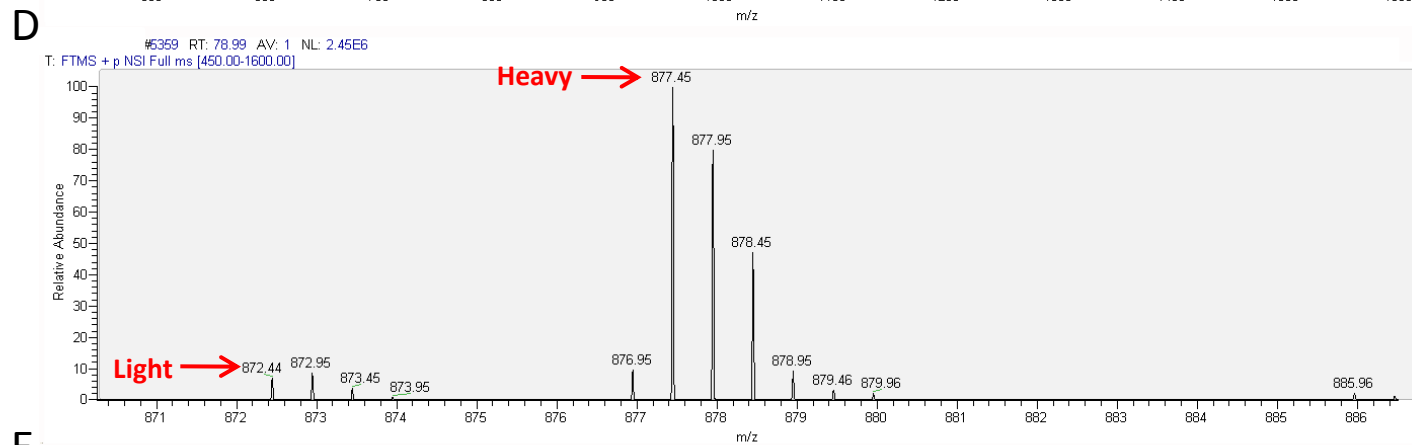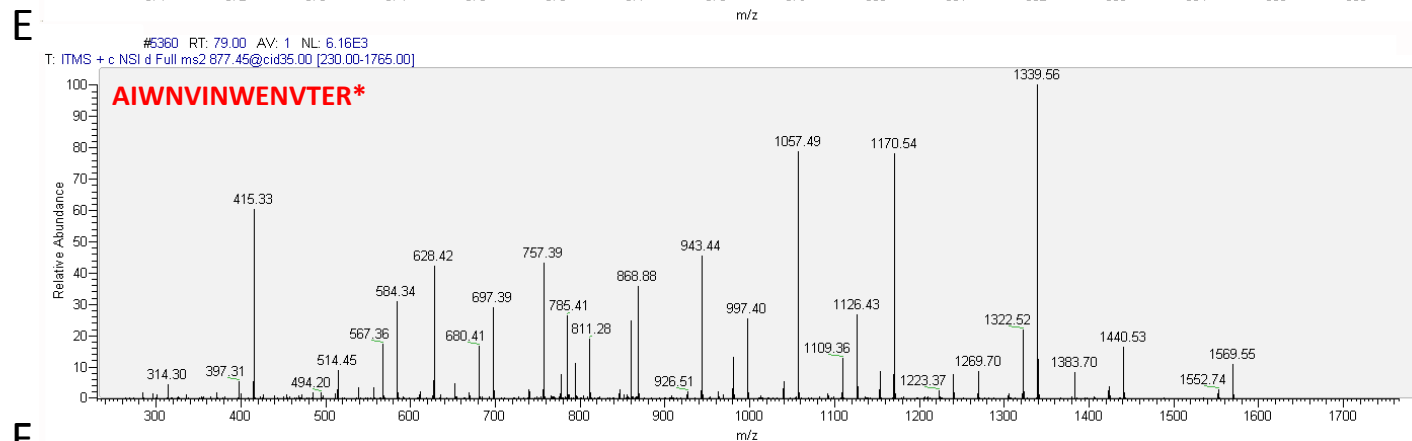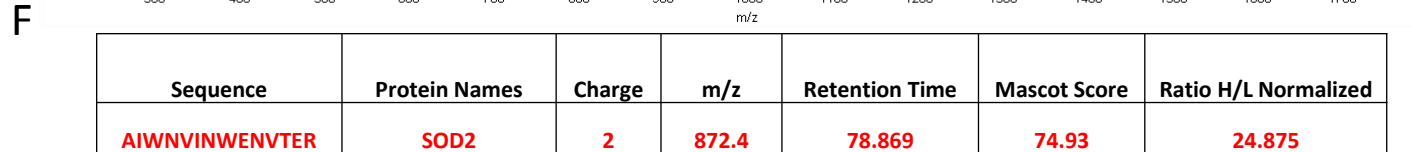

**F**

| Sequence            | Protein Names | Charge   | m/z          | Retention Time | Mascot Score | Ratio H/L Normalized |
|---------------------|---------------|----------|--------------|----------------|--------------|----------------------|
| <b>AIWNVINWENVT</b> | <b>SOD2</b>   | <b>2</b> | <b>872.4</b> | <b>78.869</b>  | <b>74.93</b> | <b>24.875</b>        |
